# Supplementary material for: Tracking global trends in the effectiveness of antibiotic therapy using the Drug Resistance Index
Source: PubMed Central journal article supplement (PMC6509601; doi:10.1136/bmjgh-2018-001315), 2019-04-11
Supplement: bmjgh-2018-001315supp001.pdf [file bmjgh-2018-001315supp001.pdf]

## **Supplementary Material**

**for**

### **Tracking Global Trends in the Effectiveness of Antibiotic Therapy Using the Drug Resistance Index**

Eili Y. Klein PhD,<sup>1,2,3</sup> Katie K. Tseng MPH,<sup>1</sup> Suraj Pant BA,<sup>1</sup> Ramanan Laxminarayan PhD<sup>1,4,5</sup>

<sup>1</sup> Center for Disease Dynamics, Economics & Policy, Washington, DC 20005

<sup>2</sup> Department of Emergency Medicine, Johns Hopkins School of Medicine, Baltimore, MD 21209

<sup>3</sup> Department of Epidemiology, Johns Hopkins Bloomberg School of Public Health, Baltimore, MD 21205

<sup>4</sup> Princeton Environmental Institute, Princeton University, Princeton, NJ 08544

<sup>5</sup> Department of Global Health, University of Washington, Seattle, WA 98104

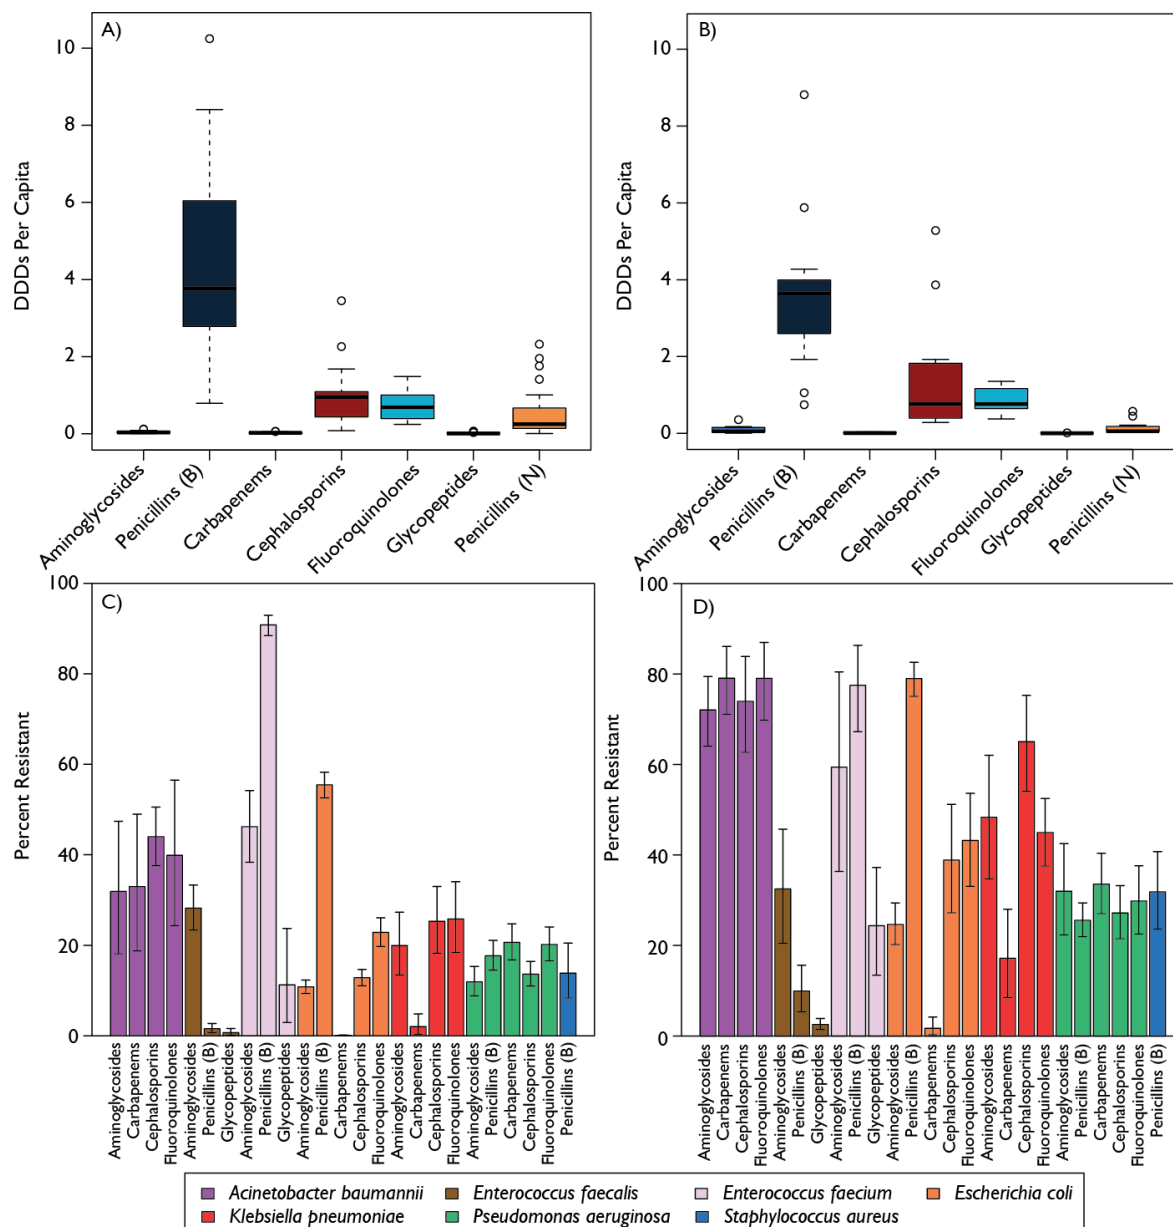

**Supplementary Figure 1: Global antibiotic use and resistance, by income class.** (A,B) Each bar plots the variability in per capita antibiotic use measured in defined daily doses (DDDs) for high-income countries (A) and low- and middle-income countries (B). The black line is the median, the colored bars are the quartiles, and the whiskers are the extremes. Additional outliers are plotted as circles. Penicillins were split into broad-spectrum, B, and narrow-spectrum, N. (C,D) Each bar is the weighted average global resistance rate for the specified antibiotic-pathogen combination in high-income countries (C) and low- and middle-income countries (D) calculated using a meta-analysis framework. Resistance data come from ResistanceMap ([resistancemap.cddep.org](http://resistancemap.cddep.org)). Antibiotic use data come from the IQVIA MIDAS database. Source: IQVIA MIDAS, 2000–2015, IQVIA Inc. All rights reserved.

**Supplementary Table 1: Global Antibiotic Use Rates by Antibiotic Class**

| <b>Antibiotic Class</b>     | <b>Median DDDs per capita (IQR)</b> |                              |                                         |
|-----------------------------|-------------------------------------|------------------------------|-----------------------------------------|
|                             | <b>Global</b>                       | <b>High Income Countries</b> | <b>Low- and Middle-Income Countries</b> |
| Aminoglycosides             | 41 (23-62)                          | 35 (22-55)                   | 59 (33-155)                             |
| Broad-spectrum penicillins  | 3,644 (2,775-5,864)                 | 3,767 (2,783-6,040)          | 3,642 (2,603-3,990)                     |
| Carbapenems                 | 23 (10-33)                          | 24 (13-34)                   | 10 (3-26)                               |
| Cephalosporins              | 824 (408-1,368)                     | 941 (441-1,091)              | 762 (397-1,824)                         |
| Fluoroquinolones            | 709 (422-1,082)                     | 688 (398-1,002)              | 762 (648-1,162)                         |
| Glycopeptides               | 8 (4-15)                            | 11 (7-17)                    | 4 (1-6)                                 |
| Narrow-spectrum penicillins | 170 (59-495)                        | 248 (142-666)                | 58 (49-179)                             |

**Supplementary Table 2: Global Antibiotic Resistance Rates by Organism and Antibiotic Class**

| Organism                | Antibiotic Class            | Percent Resistant (Confidence Interval) |                       |                                  |
|-------------------------|-----------------------------|-----------------------------------------|-----------------------|----------------------------------|
|                         |                             | Global                                  | High Income Countries | Low- and Middle-Income Countries |
| Acinetobacter baumannii | Aminoglycosides             | 44.7 (35.4-54.0)                        | 31.9 (18.1-47.4)      | 72.1 (64.0-79.4)                 |
| Acinetobacter baumannii | Carbapenems                 | 49.0 (38.9-59.2)                        | 33.0 (18.7-49.0)      | 79.1 (71.1-86.1)                 |
| Acinetobacter baumannii | Cephalosporins              | 70.8 (59.1-81.2)                        | 44.0 (37.6-50.5)      | 74.0 (62.7-83.9)                 |
| Acinetobacter baumannii | Fluoroquinolones            | 53.7 (43.3-64.0)                        | 39.9 (24.4-56.5)      | 79.0 (69.8-87.0)                 |
| Enterococcus faecalis   | Aminoglycosides             | 28.9 (24.5-33.6)                        | 28.2 (23.3-33.3)      | 32.5 (20.5-45.7)                 |
| Enterococcus faecalis   | Broad-spectrum penicillins  | 3.3 (1.9-4.9)                           | 1.5 (0.7-2.7)         | 9.9 (5.3-15.7)                   |
| Enterococcus faecalis   | Glycopeptides               | 1.1 (0.5-1.9)                           | 0.7 (0.1-1.6)         | 2.5 (1.4-3.9)                    |
| Enterococcus faecium    | Aminoglycosides             | 48.2 (40.9-55.6)                        | 46.2 (38.3-54.2)      | 59.4 (36.4-80.5)                 |
| Enterococcus faecium    | Broad-spectrum penicillins  | 88.2 (85.5-90.6)                        | 90.8 (88.5-92.9)      | 77.5 (67.2-86.3)                 |
| Enterococcus faecium    | Glycopeptides               | 14.7 (6.9-24.8)                         | 11.3 (2.9-23.7)       | 24.3 (13.4-37.2)                 |
| Escherichia coli        | Aminoglycosides             | 14.5 (12.2-17.0)                        | 10.8 (9.4-12.3)       | 24.7 (20.2-29.4)                 |
| Escherichia coli        | Broad-spectrum penicillins  | 63.1 (58.9-67.2)                        | 55.4 (52.6-58.3)      | 79.0 (75.1-82.6)                 |
| Escherichia coli        | Carbapenems                 | 0.3 (0.1-0.6)                           | 0.1 (0.0-0.2)         | 1.7 (0.3-4.2)                    |
| Escherichia coli        | Cephalosporins              | 19.7 (15.9-23.8)                        | 12.8 (11.1-14.7)      | 38.9 (27.2-51.2)                 |
| Escherichia coli        | Fluoroquinolones            | 28.6 (24.7-32.8)                        | 22.8 (19.7-26.1)      | 43.2 (33.1-53.6)                 |
| Klebsiella pneumoniae   | Aminoglycosides             | 27.5 (20.5-35.1)                        | 19.9 (13.5-27.3)      | 48.3 (34.7-62.0)                 |
| Klebsiella pneumoniae   | Carbapenems                 | 5.2 (2.5-8.9)                           | 2.0 (0.4-4.8)         | 17.2 (8.5-28.0)                  |
| Klebsiella pneumoniae   | Cephalosporins              | 37.0 (28.6-45.8)                        | 25.3 (18.3-33.0)      | 65.1 (54.1-75.3)                 |
| Klebsiella pneumoniae   | Fluoroquinolones            | 31.4 (25.3-37.7)                        | 25.8 (18.4-34.0)      | 45.0 (37.6-52.5)                 |
| Pseudomonas aeruginosa  | Aminoglycosides             | 17.3 (13.7-21.2)                        | 11.9 (8.8-15.3)       | 32.0 (22.3-42.5)                 |
| Pseudomonas aeruginosa  | Broad-spectrum penicillins  | 19.8 (16.9-22.8)                        | 17.6 (14.5-21.1)      | 25.6 (21.9-29.4)                 |
| Pseudomonas aeruginosa  | Carbapenems                 | 24.5 (20.8-28.5)                        | 20.6 (16.8-24.8)      | 33.6 (27.0-40.4)                 |
| Pseudomonas aeruginosa  | Cephalosporins              | 17.4 (14.7-20.3)                        | 13.6 (11.0-16.4)      | 27.2 (21.5-33.2)                 |
| Pseudomonas aeruginosa  | Fluoroquinolones            | 23.2 (19.8-26.7)                        | 20.2 (16.6-24.0)      | 29.8 (22.6-37.6)                 |
| Staphylococcus aureus   | Narrow-spectrum penicillins | 18.9 (13.8-24.6)                        | 13.8 (8.3-20.5)       | 31.9 (23.6-40.8)                 |

**Supplementary Table 3: Drug Resistance Index**

| <b>Country</b>         | <b>DRI (Confidence Interval)</b> |
|------------------------|----------------------------------|
| Sweden                 | 8.1 (1.3-14.9)                   |
| Canada                 | 9.7 (0.0-45.5)                   |
| Norway                 | 16.5 (8.6-24.3)                  |
| United States          | 18.0 (15.0-20.9)                 |
| Finland                | 20.2 (13.3-27.1)                 |
| Denmark                | 24.1 (17.6-30.5)                 |
| Germany                | 27.7 (23.3-32.2)                 |
| Austria                | 32.8 (27.1-38.4)                 |
| Switzerland            | 32.9 (27.4-38.5)                 |
| Estonia                | 34.2 (16.7-51.8)                 |
| Netherlands            | 34.3 (28.6-40.0)                 |
| Czech Republic         | 37.9 (31.1-44.7)                 |
| Australia              | 38.6 (32.4-44.7)                 |
| Hungary                | 38.8 (32.3-45.3)                 |
| Slovenia               | 39.3 (28.5-50.0)                 |
| Poland                 | 40.1 (30.8-49.4)                 |
| Croatia                | 40.7 (30.6-50.8)                 |
| France                 | 42.3 (38.7-45.8)                 |
| Belgium                | 43.1 (36.2-49.9)                 |
| Luxembourg             | 44.1 (27.8-60.4)                 |
| Portugal               | 44.3 (39.6-49.0)                 |
| United Kingdom         | 45.4 (39.1-51.6)                 |
| Lithuania              | 46.2 (31.6-60.9)                 |
| Vietnam                | 46.8 (26.1-67.4)                 |
| Greece                 | 46.8 (40.2-53.4)                 |
| Italy                  | 47.0 (42.4-51.6)                 |
| Bulgaria               | 47.6 (27.7-67.5)                 |
| Spain                  | 47.8 (43.3-52.4)                 |
| Slovakia               | 48.1 (37.2-59.0)                 |
| Ireland                | 48.4 (40.4-56.4)                 |
| Mexico                 | 49.2 (16.7-81.7)                 |
| Latvia                 | 50.6 (29.7-71.6)                 |
| Argentina              | 50.8 (45.3-56.3)                 |
| Bosnia and Herzegovina | 51.7 (30.0-73.4)                 |
| Turkey                 | 53.9 (48.9-58.9)                 |
| South Africa           | 54.3 (49.8-58.9)                 |
| Serbia                 | 55.5 (41.3-69.6)                 |
| Venezuela              | 58.9 (48.1-69.8)                 |
| Ecuador                | 60.3 (43.2-77.4)                 |
| Thailand               | 60.6 (55.4-65.8)                 |
| India                  | 71.6 (64.8-78.5)                 |
